# Supplementary material for: Synthesis of monodisperse ferromagnetic CoxFe3−xO4colloidal particles with magnetically tunable optical properties
Source: Royal Society of Chemistry journal article supplement (doi:10.1039/c8ce01702f), 2019-01-01
Supplement: c8ce01702f1.pdf [file c8ce01702f1.pdf]

## Supporting information

Figure S1

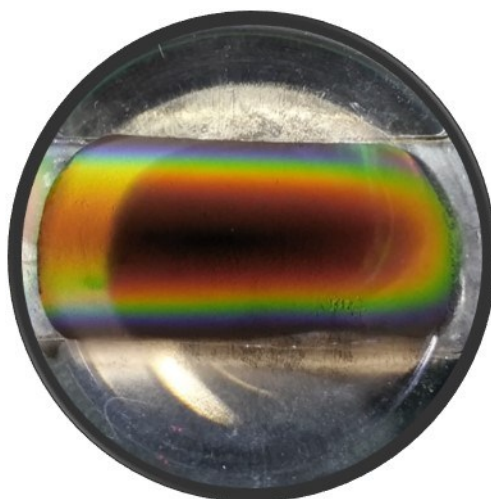

**Fig. S1** Structural color of  $\text{Co}_{0.75}\text{Fe}_{2.25}\text{O}_4$  colloidal particles.

Figure S2

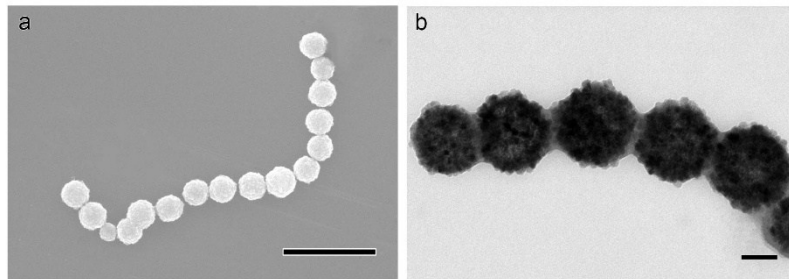

**Fig. S2** Magnetic-field induced self-assembly of  $\text{Co}_{0.75}\text{Fe}_{2.25}\text{O}_4$ . (a) SEM image. (b) TEM image. Scale bars, (a)  $1\mu\text{m}$ , (b)  $100\text{nm}$ .

Figure S3

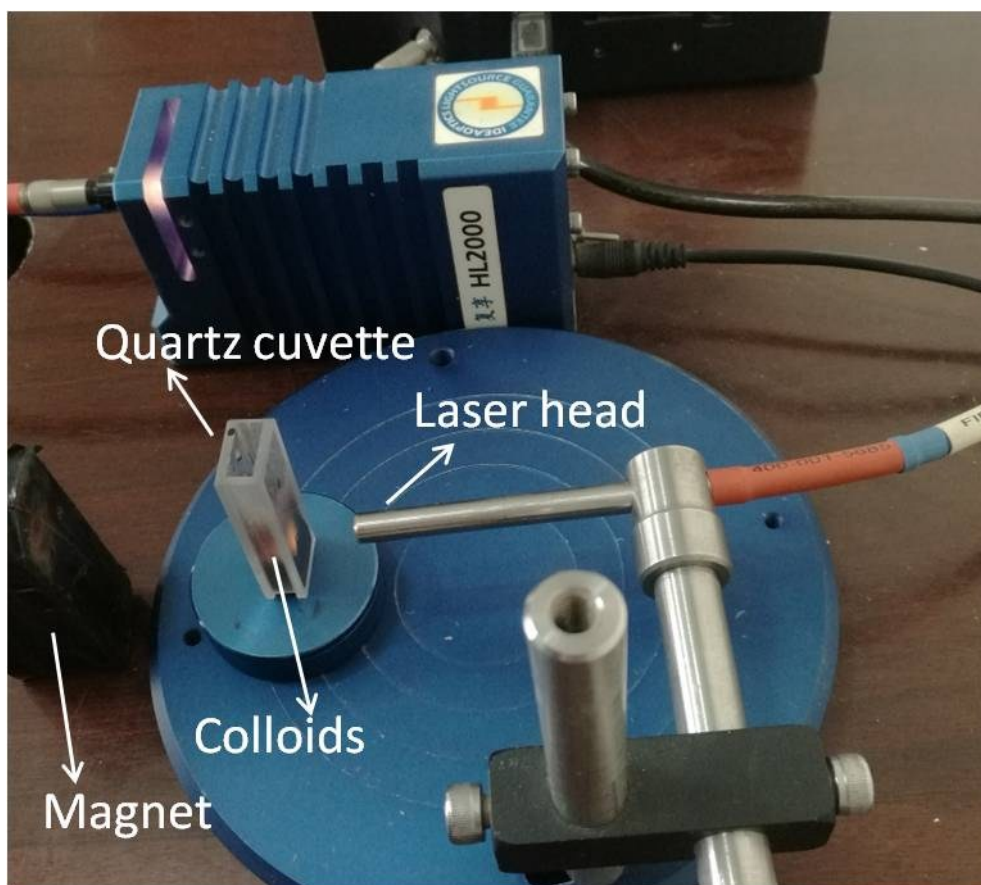

Fig. S3 Photo of reflection spectrum measurement of  $\text{Co}_x\text{Fe}_{3-x}\text{O}_4$  suspension under magnetic field.
